# Supplementary material for: A fluorescent hydrogen-bonded organic framework for highly selective sensing of mono-nitrophenol isomers in water
Source: Royal Society of Chemistry journal article supplement (doi:10.1039/d3ta05309a), 2023-11-20
Supplement: d3ta05309a1.pdf [file d3ta05309a1.pdf]

# Supporting Information

## **A Fluorescent Hydrogen-Bonded Organic Framework for Highly Selective Sensing of Mono-Nitrophenol Isomers in Water**

Yu-Xin Lin,<sup>‡</sup> Chenghao Jiang,<sup>‡</sup> Yu-Bo Wang,<sup>‡</sup> Jia-Xin Wang, Bin Li\* and Guodong Qian\*

State Key Laboratory of Silicon and Advanced Semiconductor Materials, School of Materials Science and Engineering, Zhejiang University, Hangzhou, 310027, China.

*\*Corresponding author: Email: bin.li@zju.edu.cn; gdqian@zju.edu.cn.*

<sup>‡</sup> These authors have contributed equally to this work.

### **Configurational Bias Monte Carlo (CBMC) simulation**

In order to obtain a reasonable binding site of PNP molecules in HOF-TPE-CN for subsequent modeling, configurational-bias Monte Carlo (CBMC) simulations were performed in the MS modeling.<sup>1,2</sup> The structure of HOF-TPE-CN, obtained from the single crystal structure without further geometry optimization, was assumed to be rigid according to the atom crystallographic positions. The structural file of PNP was taken from Chem 3D with minimum energy optimization. The calculations were performed at 298 K, adopting the universal force field (UFF) combined with the QEq method. Interatomic interactions were modeled with standard Lennard-Jones potential and Coulombic potentials. The long-range electrostatic interactions were handled using the Ewald summation method. The loading steps and the equilibration steps were  $1 \times 10^5$ , the production steps were  $1 \times 10^6$ . A nonbonding parameter was utilized to determine the pairwise interactions between the host and guest atoms of the particular force field.

### **Density functional theory calculations**

The calculated structure of HOF-TPE-CN was built from its single crystal structures and the position of the hydrogen atom was optimized while the other atoms kept their position unchanged. The long-range corrected hybrid functional CAM-B3lyp was carried out with the 6-311G(d) basis set for ONP, MNP, PNP, and the fragment of HOF.<sup>3</sup> The DFT-D3 with BJ-damping was applied to correct the weak interaction to improve the calculation accuracy. Calculations are then performed to determine orbital energy levels and to analyze orbital diagrams.

### **Calculations of $K_{sv}$ and detection limit**

Quenching constant  $K_{sv}$  was calculated according to the Stein–Volmer (S–V) equation:<sup>4</sup>

$$I_0/I - 1 = K_{sv} [A] \quad (2)$$

where  $I_0$  and  $I$  represent the fluorescence intensities of HOF-TPE-CN probes before and after the addition of nitrophenols, respectively.  $[A]$  is the molar concentration of nitrophenols. There is a linear relationship between  $[A]$  and  $I_0/I$  at low concentrations.  $K_{sv}$  was obtained by plotting the change in the fluorescence intensity vs the concentration of nitrophenols.

The limit of detection was calculated based on the IUPAC recommendation ( $3\sigma/K$ ) method. The standard deviation  $\sigma$  was estimated by the fluorescence intensity of the 10 blank HOF-TPE-CN/water suspension in the absence of analytes.  $K$  is the slope value of the linearity, which is calculated using a calibration curve for the fluorescence intensity vs the concentration of nitrophenols.

## General characterization

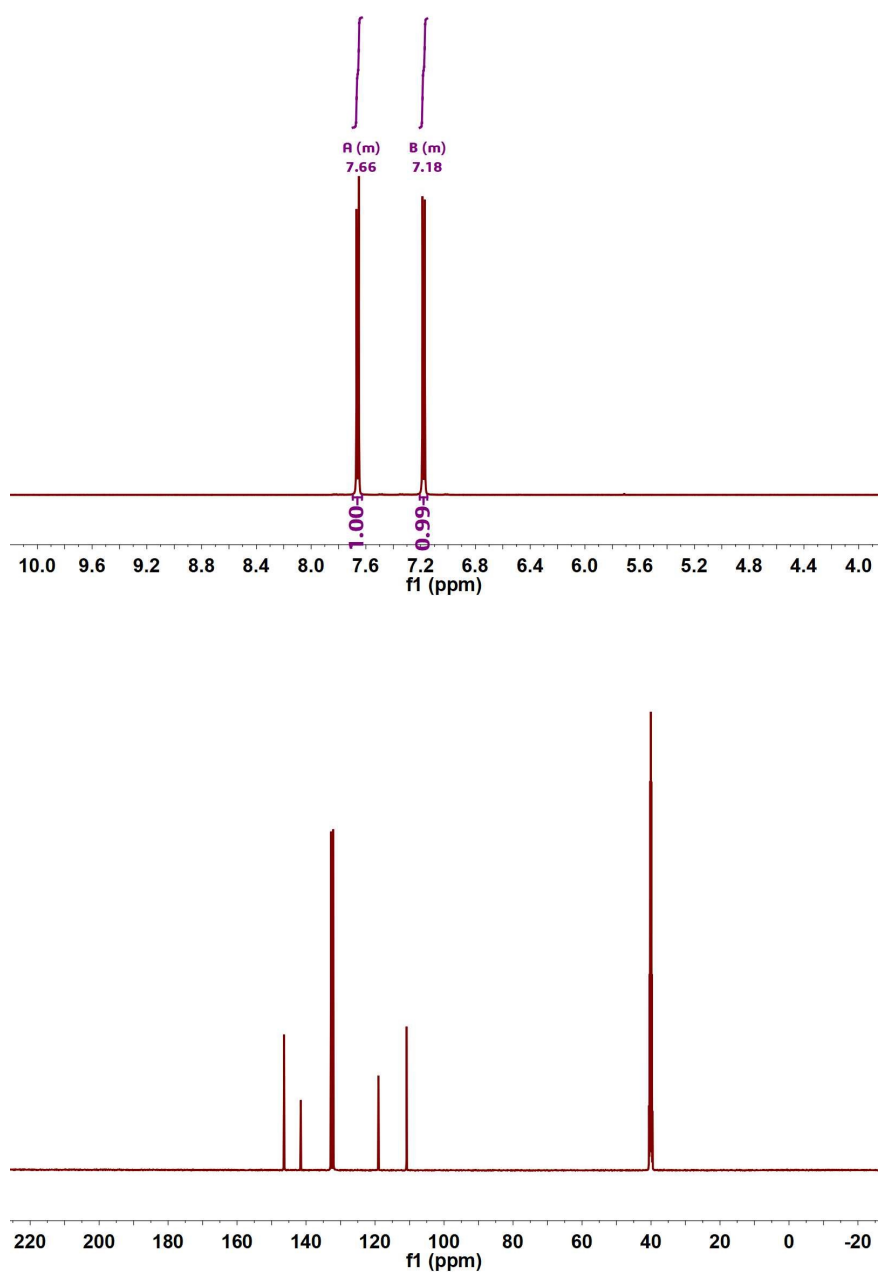

**Fig. S1**  $^1\text{H}$  NMR and  $^{13}\text{C}$  NMR spectrum of TPE-CN in DMSO- $d_6$ .

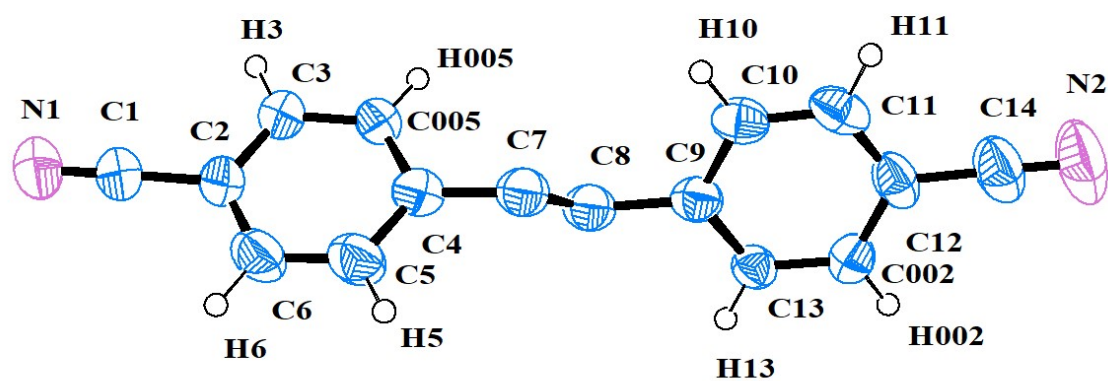

**Fig. S2** ORTEP plot of the asymmetric unit of HOF-TPE-CN.<sup>5</sup> All non-hydrogen atoms are represented by thermal ellipsoids drawn at 50% probability level.

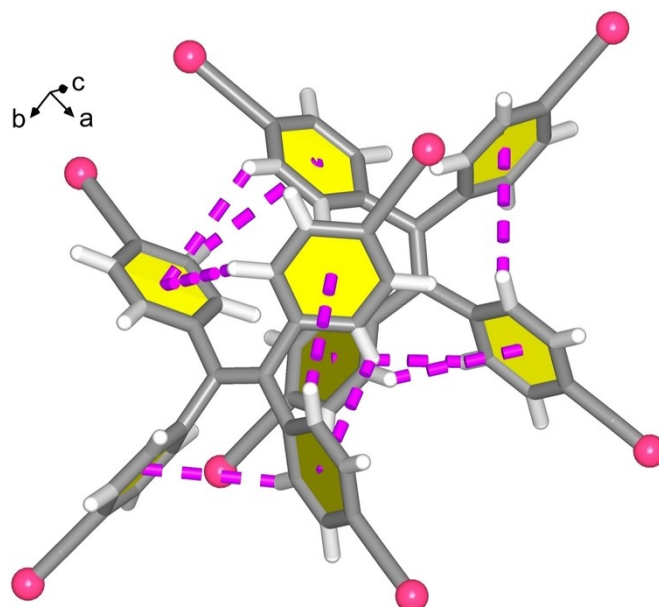

**Fig. S3** Peripheral C–H··· $\pi$  interactions.

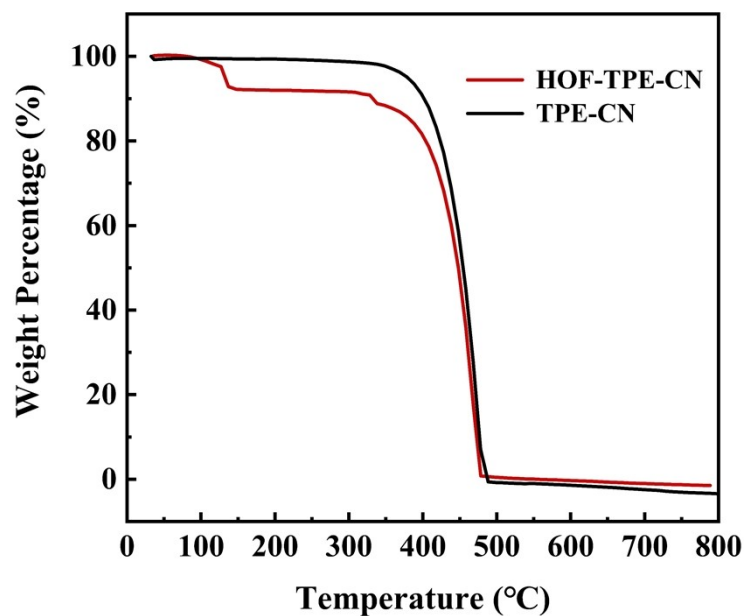

**Fig. S4** TGA curve of TPE-CN and as-synthesized HOF-TPE-CN.

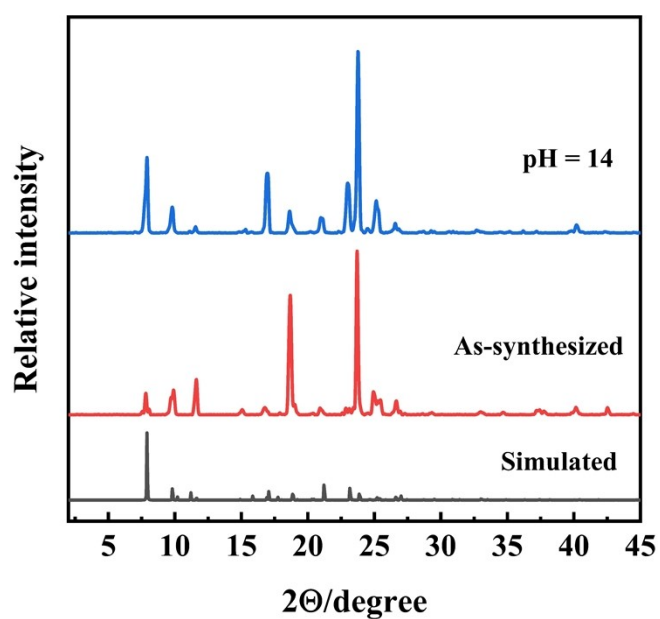

**Fig. S5** PXRD patterns of as-synthesized HOF-TPE-CN and after immersed in pH = 14 NaOH solutions.

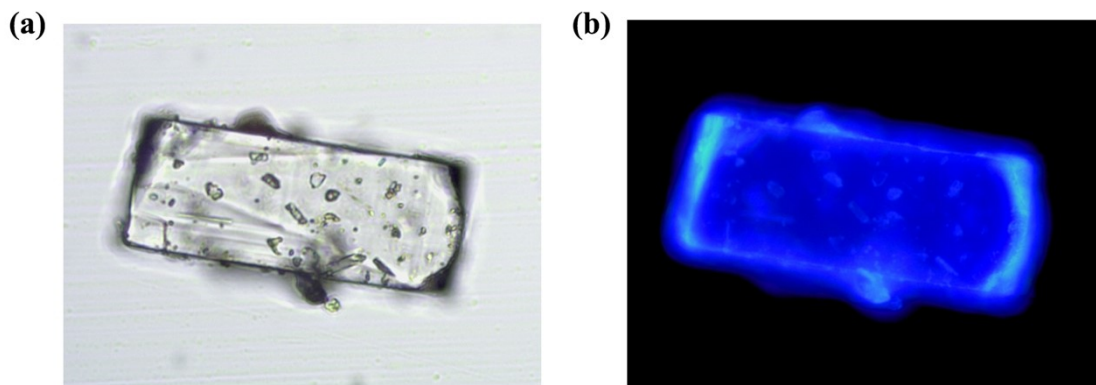

Fig. S6 The optical microscopy image of crystals after soaking into pH = 14 NaOH solutions under (a) bright field and (b) 365 nm excitation.

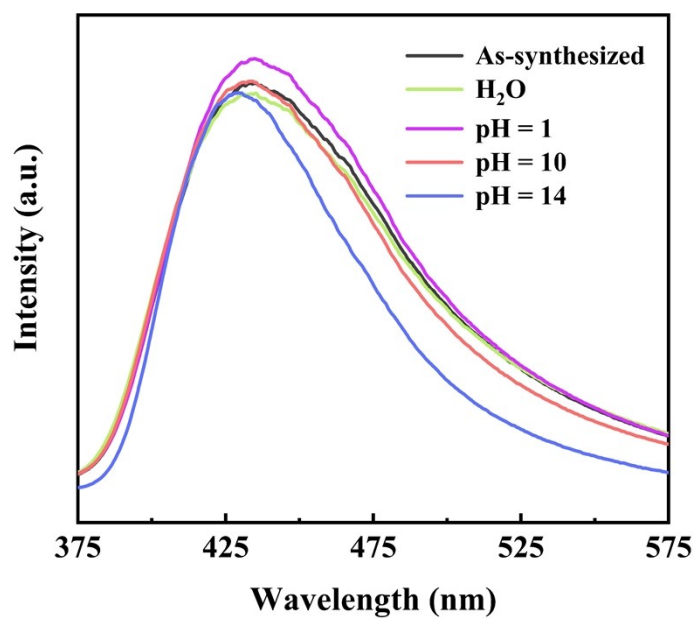

Fig. S7 Fluorescence spectra of HOF-TPE-CN after treatment with different pH aqueous solutions.

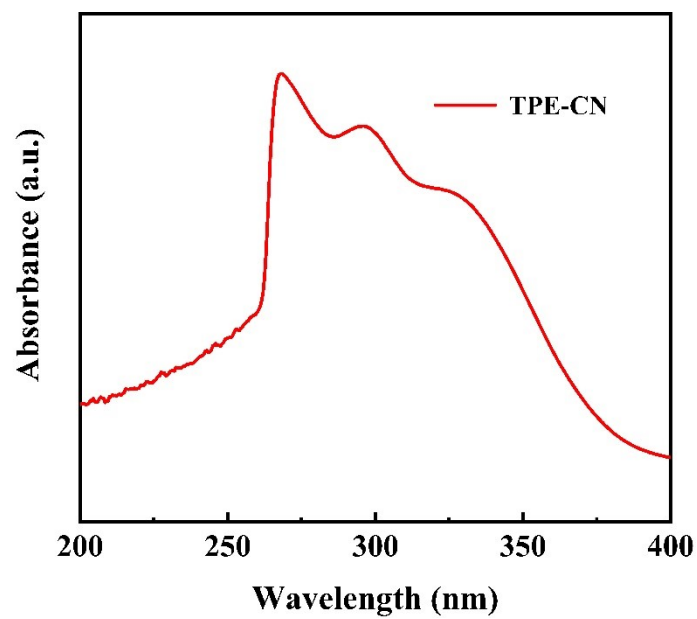

**Fig. S8** UV-Vis spectrum of TPE-CN (10  $\mu\text{M}$ ) in DMF solution.

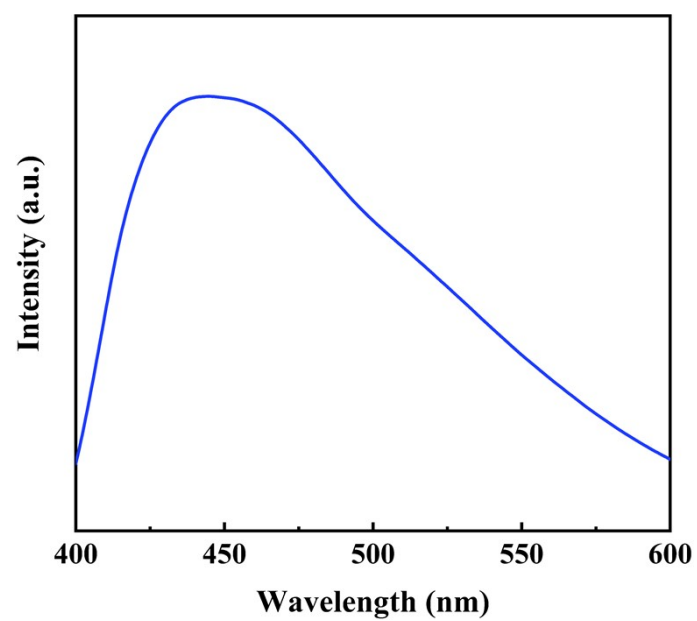

**Fig. S9** Fluorescence emission spectra of a single crystal under the excitation of 365 nm.

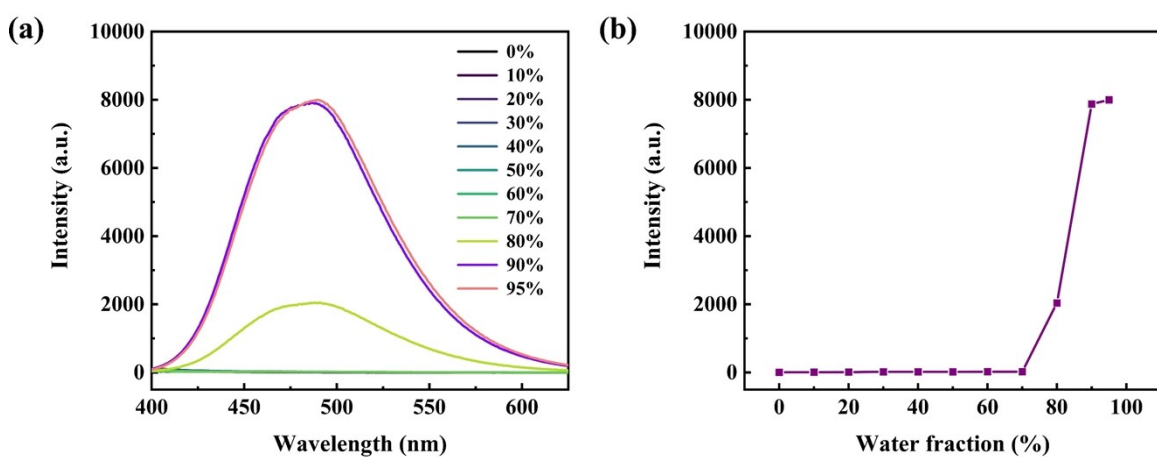

**Fig. S10** (a) The fluorescence spectra of TPE-CN (10 μM) in acetone/H<sub>2</sub>O mixtures with different H<sub>2</sub>O fractions. (b) Changes of fluorescence intensity of TPE-CN in acetone/H<sub>2</sub>O mixtures ( $\lambda = 490$  nm) with different water fractions.  $\lambda_{\text{ex}} = 324$  nm.

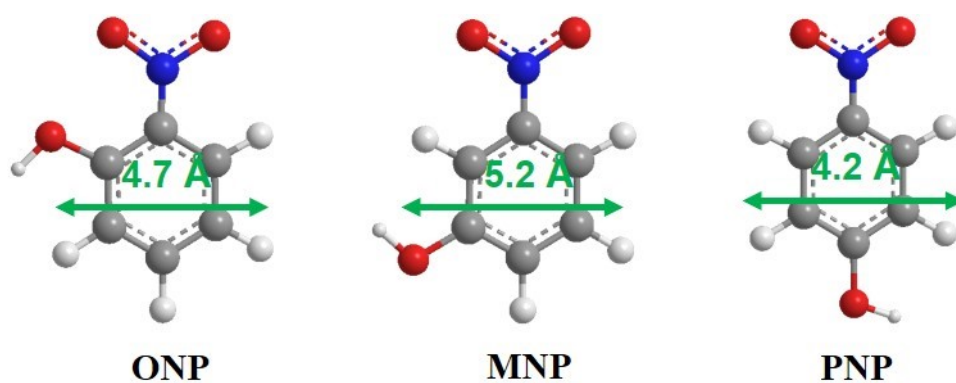

**Fig. S11** The dimension of nitrophenol molecules.



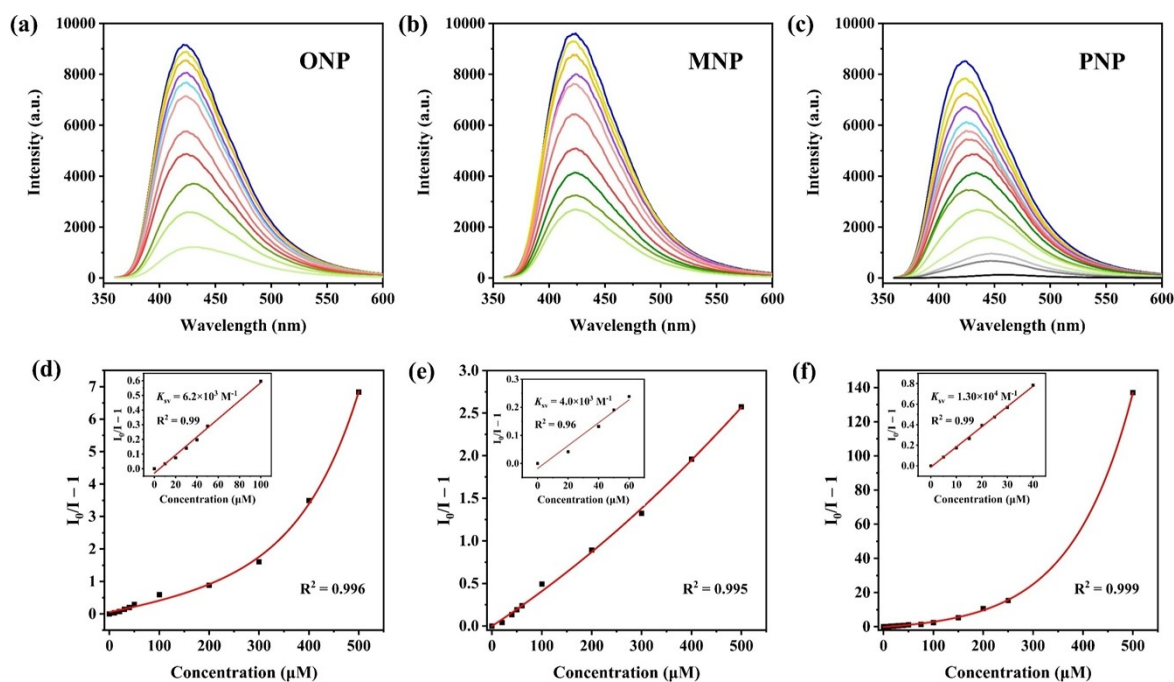

**Fig. S12** Fluorescence spectra of HOF-TPE-CN dispersing in tap water (1 mg/mL) with the increasing concentrations (0–500  $\mu\text{M}$ ) of (a) ONP; (b) MNP; (c) PNP.

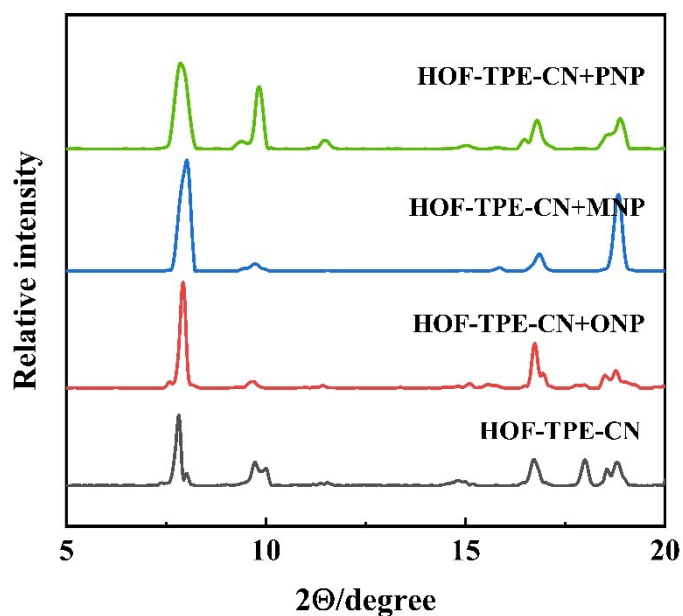

**Fig. S13** PXRD patterns of HOF-TPE-CN and after immersed in nitrophenol solution ( $1 \times 10^{-2} \text{ M}$ ) for 2 days.

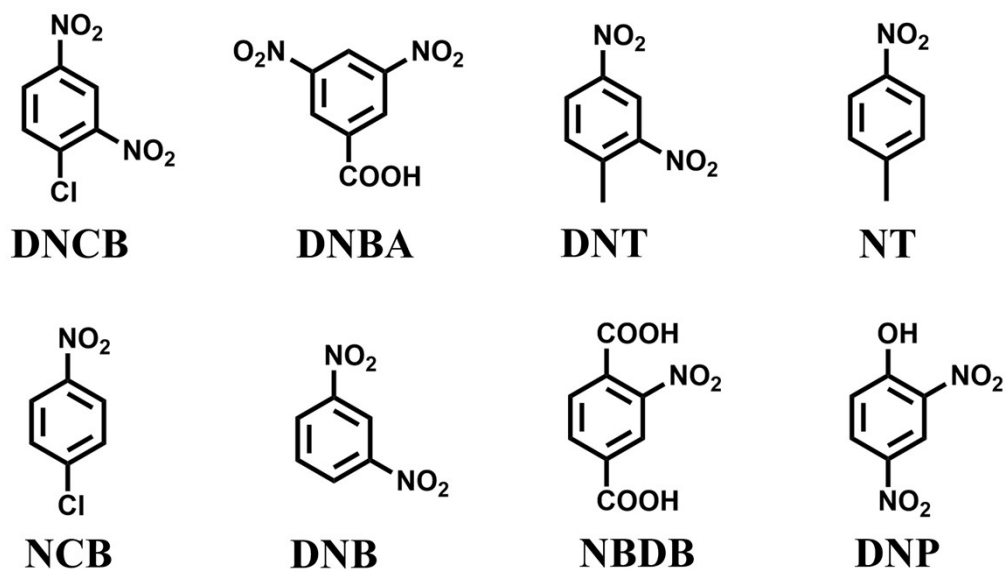

**Fig. S14** Molecular structure and abbreviations of different nitroaromatic compounds.

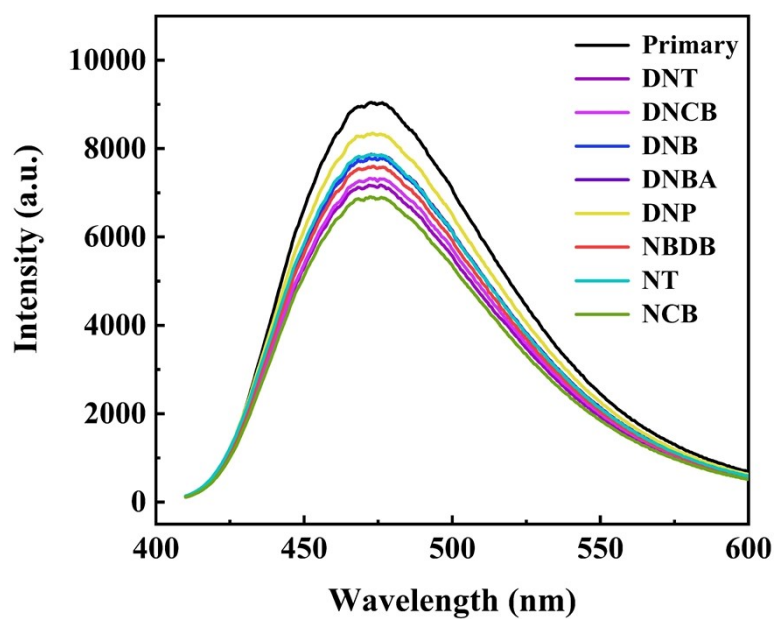

**Fig. S15** The fluorescence spectra after adding different nitroaromatic compounds at the concentration of 500  $\mu\text{M}$ .

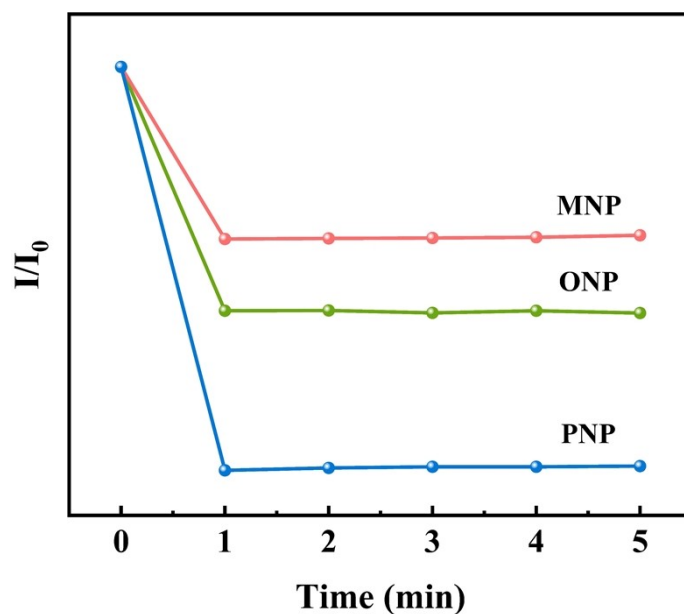

**Fig. S16** The variation of fluorescence intensity of HOF-TPE-CN at 425 nm over time after the addition of nitrophenol ( $100 \mu\text{M}$ ).

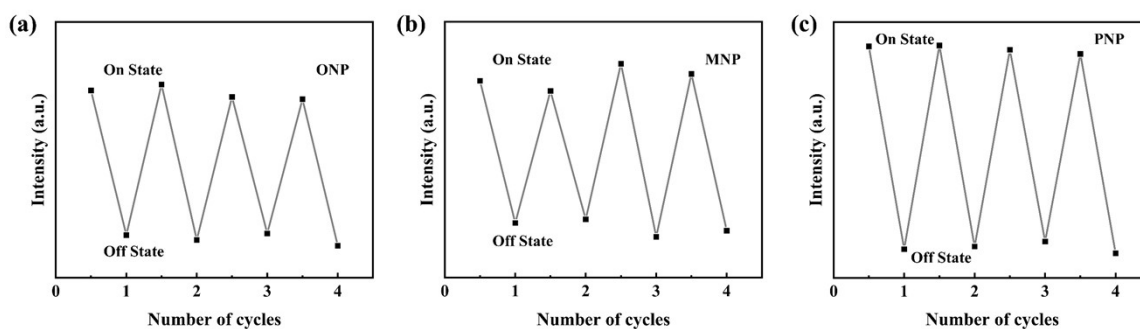

**Fig. S17** Quenching and recovery test of HOF-TPE-CN toward (a) ONP, (b) MNP, and (c) PNP. The fluorescence intensity of HOF-TPE-CN suspension was recorded before and after adding the sample into  $50 \mu\text{M}$  mono-nitrophenols, respectively. The HOF-TPE-CN samples were recovered by centrifugation and washed with  $\text{H}_2\text{O}$  solutions in several times. Then, the HOF-TPE-CN suspension was prepared with the same initial concentration for the next cycle.

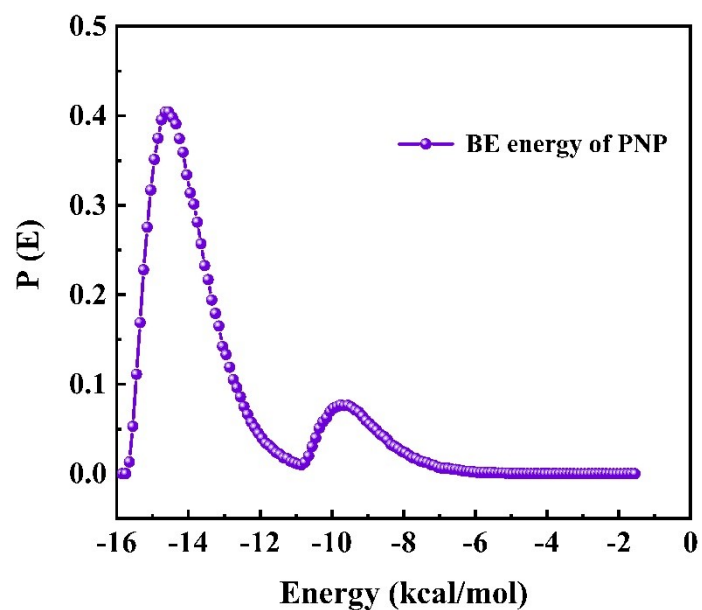

**Fig. S18** CBMC molecular simulation: binding energy of PNP with HOF-TPE-CN.

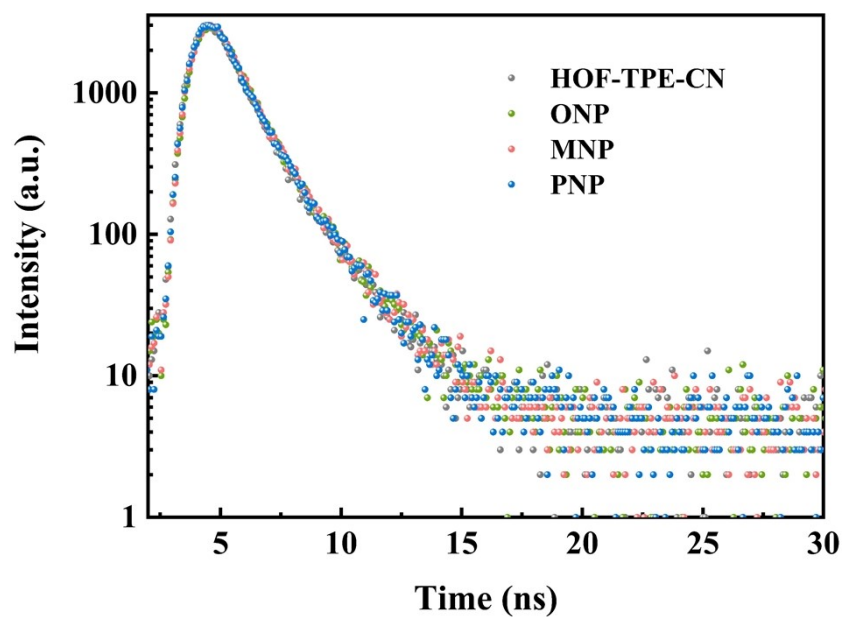

**Fig. S19** The change of lifetime curves of HOF-TPE-CN at 420 nm before and after adding nitrophenol.

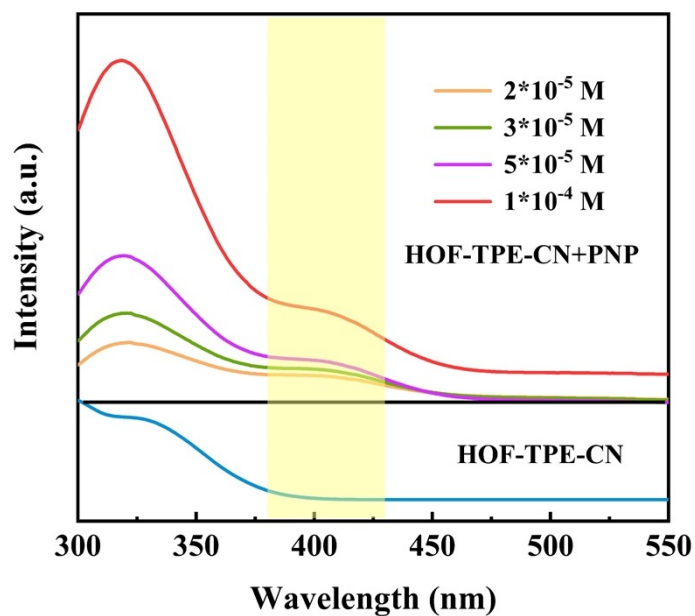

**Fig. S20** UV-vis spectra of HOF-TPE-CN on incremental addition of PNP solution in water. As the gradual addition of PNP, a new peak appears in the UV-vis absorption spectrum of HOF-TPE-CN around 400 nm indicates the formation of stable ground-state charge transfer complexes

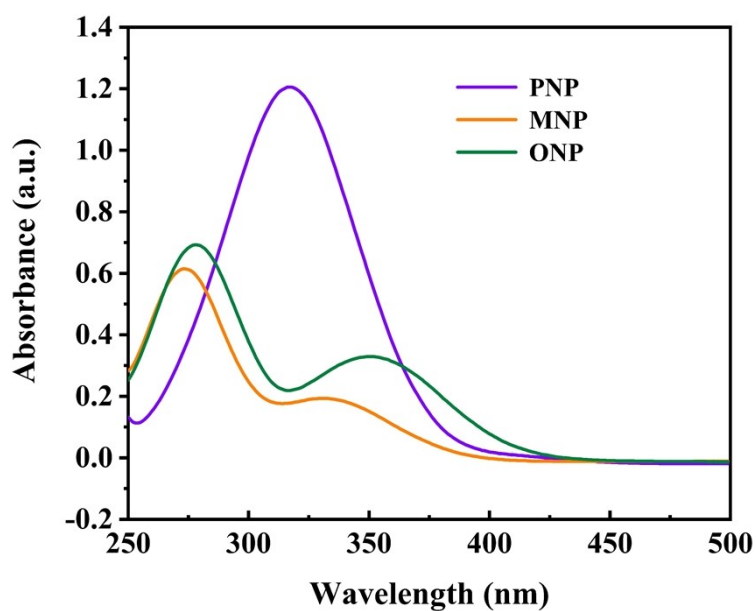

**Fig. S21** UV-vis spectra of mono-nitrophenols in water.

**Table S1** Crystallographic data and structure refinement results of HOF-TPE-CN.

| Unit cell parameters                           | HOF-TPE-CN                                     |
|------------------------------------------------|------------------------------------------------|
| Formula                                        | C <sub>30</sub> H <sub>16</sub> N <sub>4</sub> |
| Formula weight                                 | 432.47                                         |
| Crystal system                                 | tetragonal                                     |
| Space group                                    | I4 <sub>1</sub> /acd                           |
| <i>a</i> (Å)                                   | 22.3509                                        |
| <i>b</i> (Å)                                   | 22.3509                                        |
| <i>c</i> (Å)                                   | 20.7853                                        |
| <i>α</i> (°)                                   | 90                                             |
| <i>β</i> (°)                                   | 90                                             |
| <i>γ</i> (°)                                   | 90                                             |
| Cell volume (Å <sup>3</sup> )                  | 10383.56                                       |
| <i>Z</i>                                       | 16                                             |
| <i>D</i> <sub>calc</sub> (g·cm <sup>-3</sup> ) | 1.1065                                         |
| <i>F</i> (000)                                 | 3584.0                                         |
| <i>GOF</i>                                     | 1.044                                          |

**Table S2** Comparison of present work with some previous reports on the detection of mono-nitrophenol.

| Material                                                     | Analytes | Medium systems | $K_{sv}$ ( $M^{-1}$ ) | Limit of Detection (LOD) | Reference |
|--------------------------------------------------------------|----------|----------------|-----------------------|--------------------------|-----------|
| $Zr_6O_4(OH)_8(H_2O)_4(CTTA)_{8/3}$                          | PNP      | $H_2O$         | $4.2 \times 10^4$     | NA                       | 6         |
| $Zr_6O_4(OH)_8(H_2O)_4(TTNA)_{8/3}$                          | PNP      | $H_2O$         | $4.7 \times 10^4$     | NA                       | 6         |
| $\{[Tb_2(L)_3(H_2O)_4] \cdot 10H_2O\}_n$                     | ONP      | DMF            | $2.1 \times 10^3$     | NA                       | 7         |
|                                                              | MNP      | DMF            | $1.9 \times 10^3$     | NA                       |           |
|                                                              | PNP      | DMF            | $4.9 \times 10^3$     | NA                       |           |
| (pbpy) $[Eu_2(NH_2BDC)_4(H_2O)] \cdot 3H_2O$                 | PNP      | DMF/ $H_2O$    | $2.52 \times 10^3$    | $9.52 \mu M$             | 8         |
|                                                              | Th-TCBPE | $H_2O$         |                       | $0.44 \mu M$             | 9         |
| CD@RCC3                                                      | ONP      |                | 75                    | NA                       | 10        |
|                                                              | MNP      |                | 24                    | NA                       |           |
|                                                              | PNP      |                | 95                    | NA                       |           |
| DL-COF                                                       | PNP      | Ethanol        | $3.18 \times 10^6$    | $57.31 nM$               | 11        |
| $[Pb_7(TTPCA)_4Cl_2] \cdot 3H_2O$                            | ONP      | DMA            | $7.6 \times 10^3$     | $7.09 \mu M$             | 12        |
| Pythz-COF,                                                   | PNP      | Ethanol        | $4.4 \times 10^4$     | $24.9 \mu M$             | 13        |
| Pyaph-COF                                                    | PNP      | Ethanol        | $2.6 \times 10^4$     | $42 \mu M$               | 13        |
| $[Zn_7(DPOT)_2(H_2O)_{11}] \cdot 2OH \cdot 3H_2O \cdot 5DMA$ | PNP      | Ethanol        | $5.78 \times 10^4$    | $4.77 \mu M$             | 14        |
| CHOF-1                                                       | PNP      | Ethanol        | NA                    | $18.78 \mu M$            | 15        |
| HOF-TPE-CN                                                   | ONP      | $H_2O$         | $7 \times 10^3$       | $1.1 \mu M$              | This work |
|                                                              | MNP      |                | $3.5 \times 10^3$     | $2.39 \mu M$             |           |
|                                                              | PNP      |                | $1.34 \times 10^4$    | $0.65 \mu M$             |           |

NA = not available

L = 5-(pyridine-4-ylmethoxy)isophthalic acid

$NH_2$ -BDC = 2-aminobenzene-1,4-dicarboxylic acid

$H_6$ TDPAT = 2,4,6-tris(3,5-dicarboxylphenylamino)-1,3,5-triazine

H<sub>3</sub>TTPCA = 1,1',1''-(1,3,5-triazine-2,4,6-triyl)-tripiperidine-4-carboxylic acid]

H<sub>6</sub>DPOT= 5,5',5''-((1,3,5-triazine-2,4,6-triyl)tris(oxy)) tri-isophthalic acid



## References

1. T. Luo, P. Das, D. L. White, C. Liu, A. Star and N. L. Rosi, *J. Am. Chem. Soc.*, 2020, **142**, 2897–2904.
2. Z. Hu, W. P. Lustig, J. Zhang, C. Zheng, H. Wang, S. J. Teat, Q. Gong, N. D. Rudd and J. Li, *J. Am. Chem. Soc.*, 2015, **137**, 16209–16215.
3. Q. Huang, K. I. Otake and S. Kitagawa, *Angew. Chem., Int. Ed.*, 2023, **62**, e202310225.
4. X. Yu, A. A. Ryadun, D. I. Pavlov, T. Y. Guselnikova, A. S. Potapov and V. P. Fedin, *Angew. Chem., Int. Ed.*, 2023, **62**, e202306680.
5. L. J. Farrugia, *J. Appl. Cryst.*, 2012, **45**, 849–854.
6. B. Wang, X. Lv, D. Feng, L. Xie, J. Zhang, M. Li, Y. Xie, J. Li and H. Zhou, *J. Am. Chem. Soc.*, 2016, **138**, 6204–6216.
7. Z. Sun, P. Hu, Y. Ma and L. Li, *Dyes Pigment.*, 2017, **143**, 10–17.
8. H. S. Li, S. H. Xing, Y. Xiao, C. Wang, Q. L. Guan, F. Y. Bai, Y. H. Xing and F. Xu, *Chem. – Eur. J.*, 2023, **29**, e202202810.
9. Q. L. Guan, F. Xu, Y. Xiao, Z. X. You, F. Y. Bai and Y. H. Xing, *Adv. Mater. Interfaces*, 2022, **9**, 2201547.
10. Z. Lu, X. Lu, Y. Zhong, Y. Hu, G. Li and R. Zhang, *Anal. Chim. Acta*, 2019, **1050**, 146–153.
11. M. Faheem, S. Aziz, X. Jing, T. Ma, J. Du, F. Sun, Y. Tian and G. Zhu, *J. Mater. Chem. A*, 2019, **7**, 27148–27155.
12. S. Yu, K. Y. Zhang, J. X. Li, Y. Xiao, L. X. Sun, F. Y. Bai and Y. H. Xing, *Inorg. Chem.*, 2021, **60**, 7887–7899.
13. S. Jiang, L. Meng, M. Lv, F. Bai, W. Tian and Y. Xing, *Microporous Mesoporous Mat.*, 2023, **348**, 112408.
14. M. Liu, M. Y. Wang, R. Huo, C. Wang, Y. H. Xing, F. Y. Bai and F. Xu, *J. Mater. Chem. C*, 2022, **10**, 11676–11685.
15. C. Zhang, F. Sun and Y. He, *ACS Appl. Mater. Interfaces*, 2023, **15**, 9970–9977.
